# Supplementary material
Source: publisher figshare collection journal article supplement (https://karger.figshare.com/ndownloader/files/14107847)
Supplement: Supplementary file 1 [file 14107847]

**Table e-6**

**Dystonia Patient ILS Response**

| **Patient No.** |  | **Settings prior to ILS*** |  | **ILS settings*** | | | |  | **Settings at last evaluation** | | | |  | **DBS Implant to ILS** | |  | **Duration on ILS** | | |  | **Testing Pre/Post ILS** | | |  | | **Response** | |  | **Continue ILS settings at last evaluation** | |  | | **Comments and reason for ILS discontinuation** |
| --- | --- | --- | --- | --- | --- | --- | --- | --- | --- | --- | --- | --- | --- | --- | --- | --- | --- | --- | --- | --- | --- | --- | --- | --- | --- | --- | --- | --- | --- | --- | --- | --- | --- |
| **MANAGEMENT OF ADVERSE EFFECTS** | | | | | | |  | | | | |  |
| DY1 |  | alternates between  R: C+0-/4/90/250  L: C+9-/4/60/250  and  R: C+0-/3.5/120/250  L: C+9-/3.5/120/250 |  | **R: C+0-/4/120/125;**  **C+1-/4/120/125**  **L: C+8-/4/120/125,**  **C+9-/4/120/125** | | | |  | **R: C+0-/4/120/125;**  **C+1-/4/120/125**  **L: C+8-/4/120/125,**  **C+9-/4/120/125** | | | |  | 13 months | |  | 2 months | | |  | __/__ | | |  | | Improvement | |  | Yes | |  | | AE: dysarthria |
| DY4 |  | R: C+3-/3.5/60/130  L: C+11-/3.5/60/130 |  | **R: C+1-/2.3/60/125**  **C+3-/3.5/60/125**  **L: C+9-/3/60/125;**  **C+11-/3.5/60/125** | | | |  | **R: C+1-/2.3/60/125**  **C+3-/3.5/60/125**  **L: C+9-/3/60/125;**  **C+11-/3.5/60/125** | | | |  | 6 months | |  | 2 weeks | | |  | __/__ | | |  | | Improvement | |  | Yes | |  | | AE: facial pulling |
| DY9 |  | R: 3+1-/2.8/60/160 (cycling mode 45s ON)  L: 11+9-/2.8/60/160 |  | R: C+2-/2.7/90/125  **L: 11+9-/2.7/60/125;**  **11+10-/2/90/125** | | | |  | R: C+2-3-/2.7/90/125  **L: 11+9-/2.7/60/125;**  **11+10-/2/90/125** | | | |  | 8 months | |  | 30 months | | |  | __/__ | | |  | | Improvement | |  | Yes | |  | | AE: paresthesia and contractions of right 3rd digit |
| DY11 |  | R: C+2-/3.9/60/130  L: C+10-/3.3/60/130 |  | **R: C+2-/3.4/60/125;**  **C+1-/3.4/60/125**  **L: C+10-/2.8/60/125;**  **C+9-/2.1/60/125** | | | |  | R: C+2-/3.4/60/130  L: C+10-/2.8/60/130 | | | |  | 19 months | |  | 2 days | | |  | __/__ | | |  | | No Benefit | |  | No | |  | | AE: dysarthria |
| DY16 |  | R: C+2-/2.5/60/130  L: C+10-/2.5/60/130 |  | **R: C+2-/2.5/90/125;**  **C+3-/2/90/125**  **L:C+10-/2.5/90/125; C+11-/2/90/125** | | | |  | R: 3+2-/4.5/60/130  L:11+10-/2/90/130 | | | |  | 2 months | |  | Program session | | |  | __/__ | | |  | | No Benefit | |  | No | |  | | AE: muscle contractions |
| **IMPROVE DYSTONIA** | | | |  | |  | | | | |
| DY2 |  | R: C+ 3-/3.8/60/130  L: C+9-/3.1/60/130 | |  | **R: C+2-/2.7/60/125;**  **C+3-/3/60/125**  **L: C+ 9-/2.4/60/125;**  **C+10-/2.6/60/125** | | | | |  | **R: C+2-/2.7/60/125;**  **C+3-/3/60/125**  **L: C+ 9-/2.4/60/125;**  **C+10-/2.6/60/125** | |  | | 5 months | | |  | 1 month | | |  | __/__ | |  | Improvement |  | Yes | |  | |  | | |
| DY3 |  | R: C+1-2-/0.7/450/130  L: C+8-9-/0.7/450/130 | |  | **R: C+1-/1.5/60/100;**  **C+2-/1.5/60/100**  L: C+9-/1/60/100 | | | | |  | OFF | |  | | 20 months | | |  | 2 days | | |  | __/__ | |  | No Benefit |  | No | |  | |  | | |
| DY5 |  | L GPI: C+1-/3.8/150/150  L VIM: C+11-/3.5/60/150 | |  | **L GPI: C+1-/3.8/125/125;**  **C+3-/1/150/125**  L VIM: C+11/3.5/60/125 | | | | |  | L GPI: C+1-/3.8/150/150  L VIM: C+11/3.5/60/150 | |  | | 1 month | | |  | 6 weeks | | |  | __/__ | |  | No Benefit |  | No | |  | |  | | |
| DY6 |  | R: C+0-/4/150/180  L: C+8-/4/150/180 | |  | **R: C+0-/4/150/125;**  **C+1-/4/150/125**  **L: C+8-/4/150/125;**  **C+9-/4/150/125** | | | | |  | R: C+0-/6/150/185  L: 9+8-/6/150/185 | |  | | 13 months | | |  | 2 months | | |  | __/__ | |  | Transient  Benefit |  | No | |  | | lingual dystonia | | |
| DY7 |  | R: C+2-/3.5/210/185  L: C+6-7-/3.5/210/185 | |  | **R: C+2-/3.2/210/125;**  **C+3-/3/210/125**  **L: C+6-/3.5/210/125;**  **C+7-/3.5/210/125** | | | | |  | **R: C+2-/2.8/210/125;**  **C+3-/3/210/125**  **L: C+6-/3.3/210/125;**  **C+7-/3.3/210/125** | |  | | 97 months | | |  | 12 months | | |  | BFMDRS-M: 32.5/18 | |  | Improvement |  | Yes | |  | | lingual dystonia | | |
| DY8 |  | R: 1+2-/3.5/60/180  L: 9+10-/3.5/60/180 | |  | **R: C+1-/1/60/125;**  **C+2-/3.5/60/125**  **L: C+10-/4.5/60/125;**  **C+9-/3/60/125** | | | | |  | R: C+3-/3.1/60/180  L: C+10-/4/60/180 | |  | | 8 months | | |  | 1 day | | |  | __/__ | |  | No Benefit |  | No | |  | |  | | |
| DY10 |  | R: C+1-2-/3.1/60/130  L: C+8-9-/2.4/60/130 | |  | R: C+1-2-/2.9/90/125  **L: C+8-/2.1/90/125;**  **C+9-/2.8/90/125** | | | | |  | R: C+1-/2.8/90/130  L: C+8-/1.9/90/130 | |  | | 5 months | | |  | 3 months | | |  | __/__ | |  | Improvement |  | No | |  | |  | | |
| DY12 |  | R: C+5-/3/60/185  L: C+1-/2.2/60/185 | |  | **R: C+5-/3.2/60/90;**  **C+6-/3.2/60/90**  **L: C+1-/2.2/60/90;**  **C+2-/2.2/60/90** | | | | |  | R: C+5-/3.2/60/185  L: C+1-/2.2/60/185 | |  | | 66 months | | |  | 1 day | | |  | TWSTRS: 20/__ | |  | No Benefit |  | No | |  | | lingual dystonia | | |
| DY13 |  | R: C+1-/2.2/60/130  L: C+8-/2.5/60/130 | |  | **R: C+1-/1.8/60/125;**  **C+2-/2/60/125**  L: C+8-9-/3.5/60/125  and  **R: C+3-/1.5/60/125;**  **2+1-/3/60/125**  L: C+8-9-/3.5/60/125 | | | | |  | R: 2+1-/4.9/60/130  L: C+8-9-/3.2/60/130 | |  | | 5 months | | |  | 6 days | | |  | __/__ | |  | No Benefit |  | No | |  | |  | | |
| DY14 |  | R: C+1-/3.6/60/185  L: C+5-6-/3.7/60/185 | |  | R: C+1-/4/60/125  **L: C+5-/4/60/125;**  **C+6-/4.5/60/125** | | | | |  | R: C+1-/4.1/90/185  L: C+5-6-/4.8/90/185 | |  | | 88 months | | |  | 1 day | | |  | __/__ | |  | No Benefit |  | No | |  | |  | | |
| DY15 |  | R: C+1-2-/4/60/185  L: C+5-6-/4/90/185 | |  | **R: C+1-/4/60/90;**  **C+2-/4/60/90**  **L: C+5-/4/60/90;**  **C+6-/4/60/90**  and  **R: C+1-/4/60/125;**  **C+2-/4/60/125**  **L: C+5-/4/90/125;**  **C+6-/4/90/125** | | | | |  | R: C+1-2-/4/60/185    L: C+5-6-/4.5/60/185 | |  | | 66 months | | |  | 2 days | | |  | UPDRSIII: 44/__ | |  | No Benefit |  | No | |  | |  | | |

Legend: Interleaving stimulation was used on both sides all patients except in DY3, DY9, DY19, DY13, DY14. Interleaving stimulation is in BOLD type.

Abbreviations: *contacts/voltage (volts) /pulse width (μs)/frequency (Hz); AE: adverse effect; BFMDRS-M: Burke Fahn Marsden Dystonia Rating Scale Motor portion; C: case; DBS; deep brain stimulation; FTMTRS: Fahn Tolosa Marin Tremor Rating Scale; L: left; R: right; TWSTRS: Toronto Western Spasmodic Torticollis Rating Scale; UPDRSIII: United Parkinson’s Disease Rating Scale part III.
